# Supplementary material for: The Relationship between COVID-19 Severity in Children and Immunoregulatory Gene Polymorphism
Source: MDPI journal article supplement (doi:10.3390/v15102093), 2023-10-14
Supplement: s1 [file s1]

**Supplementary Materials:** The following supporting information can be downloaded at: <https://www.mdpi.com/article/10.3390/v15102093/s1>, Table S1: Test for Hardy–Weinberg equilibrium for ACE2 rs2074192, IFNAR2 rs2236757 and TYK2 rs2304256. Table S2: Test for Hardy–Weinberg equilibrium for OAS1 rs10774671 and OAS3 rs10735079. Table S3: Test for Hardy–Weinberg equilibrium for CD40 rs4813003, FCGR2A rs1801274 and CASP3 rs113420705.

**Table S1.** Test for Hardy-Weinberg equilibrium for ACE2 rs2074192, IFNAR2 rs2236757, TYK2 rs2304256

| Group                               | Genotype           | ACE2 rs2074192                   |          | IFNAR2 rs2236757                |          | TYK2 rs2304256                |          |
|-------------------------------------|--------------------|----------------------------------|----------|---------------------------------|----------|-------------------------------|----------|
|                                     |                    | Expected                         | Observed | Expected                        | Observed | Expected                      | Observed |
| All patients                        | Common             | 19.3                             | 29       | 19.8                            | 25       | 34.7                          | 37       |
|                                     | Homozygotes        |                                  |          |                                 |          |                               |          |
|                                     | Heterozygotes      | 37.5                             | 17       | 37.5                            | 27       | 32.6                          | 28       |
|                                     | Rare               | 18.3                             | 29       | 17.8                            | 23       | 7.7                           | 10       |
|                                     | Homozygotes        |                                  |          |                                 |          |                               |          |
|                                     | $\chi^2$ , p-value | $\chi^2 = 22.41$ ; $p < 0.001^*$ |          | $\chi^2 = 5.86$ ; $p = 0.016^*$ |          | $\chi^2 = 1.52$ ; $p = 0.218$ |          |
| COVID-19 patients                   | Common             | 12.6                             | 21       | 13.5                            | 18       | 26.0                          | 28       |
|                                     | Homozygotes        |                                  |          |                                 |          |                               |          |
|                                     | Heterozygotes      | 29.8                             | 13       | 29.9                            | 21       | 27.0                          | 23       |
|                                     | Rare               | 17.6                             | 26       | 16.5                            | 21       | 7.0                           | 9        |
|                                     | Homozygotes        |                                  |          |                                 |          |                               |          |
|                                     | $\chi^2$ , p-value | $\chi^2 = 19.06$ ; $p < 0.001^*$ |          | $\chi^2 = 5.34$ ; $p = 0.021^*$ |          | $\chi^2 = 1.31$ ; $p = 0.252$ |          |
| Control group (noninfected persons) | Common             | 6.67                             | 8        | 6.7                             | 7        | 8.8                           | 9        |
|                                     | Homozygotes        |                                  |          |                                 |          |                               |          |
|                                     | Heterozygotes      | 6.67                             | 4        | 6.7                             | 6        | 5.4                           | 5        |
|                                     | Rare               | 1.67                             | 3        | 1.7                             | 2        | 0.8                           | 1        |
|                                     | Homozygotes        |                                  |          |                                 |          |                               |          |
|                                     | $\chi^2$ , p-value | $\chi^2 = 2.40$ ; $p = 0.121$    |          | $\chi^2 = 0.15$ ; $p = 0.696$   |          | $\chi^2 = 0.07$ ; $p = 0.791$ |          |

Abbreviations:  $\chi^2$  – chi-squared test, p-value – level of its significance.

\* – statistically significant result.

**Table S2.** Test for Hardy-Weinberg equilibrium for OAS1 rs10774671, OAS3 rs10735079

| Group                               | Genotype           | OAS1 rs10774671)              |          | OAS3 rs10735079                  |          |
|-------------------------------------|--------------------|-------------------------------|----------|----------------------------------|----------|
|                                     |                    | Expected                      | Observed | Expected                         | Observed |
| All patients                        | Common             | 19.5                          | 21       | 31.4                             | 38       |
|                                     | Homozygotes        |                               |          |                                  |          |
|                                     | Heterozygotes      | 38.0                          | 33       | 34.3                             | 21       |
|                                     | Rare Homozygotes   | 18.5                          | 21       | 9.4                              | 16       |
|                                     | $\chi^2$ , p-value | $\chi^2 = 1.31$ ; $p = 0.299$ |          | $\chi^2 = 11.25$ ; $p < 0.001^*$ |          |
| COVID-19 patients                   | Common             | 11.3                          | 13       | 22.8                             | 28       |
|                                     | Homozygotes        |                               |          |                                  |          |
|                                     | Heterozygotes      | 29.5                          | 26       | 28.4                             | 18       |
|                                     | Rare Homozygotes   | 19.3                          | 21       | 8.8                              | 14       |
|                                     | $\chi^2$ , p-value | $\chi^2 = 0.83$ ; $p = 0.362$ |          | $\chi^2 = 8.01$ ; $p = 0.005^*$  |          |
| Control group (noninfected persons) | Common             | 8.8                           | 8        | 8.8                              | 10       |
|                                     | Homozygotes        |                               |          |                                  |          |
|                                     | Heterozygotes      | 5.4                           | 7        | 5.4                              | 3        |
|                                     | Rare Homozygotes   | 0.8                           | 0        | 0.8                              | 2        |
|                                     | $\chi^2$ , p-value | $\chi^2 = 1.39$ ; $p = 0.238$ |          | $\chi^2 = 2.92$ ; $p = 0.088$    |          |

Abbreviations:  $\chi^2$  – chi-squared test, p-value – level of its significance.

\* – statistically significant result.

**Table S3.** Test for Hardy-Weinberg equilibrium for CD40 rs4813003, FCGR2A rs1801274, CASP3 rs113420705

| Group                               | Genotype           | CD40 rs4813003              |          | FCGR2A rs1801274             |          | CASP3 rs113420705             |          |
|-------------------------------------|--------------------|-----------------------------|----------|------------------------------|----------|-------------------------------|----------|
|                                     |                    | Expected                    | Observed | Expected                     | Observed | Expected                      | Observed |
| All patients                        | Common             | 62.6                        | 63       | 25.8                         | 30       | 18.8                          | 13       |
|                                     | Homozygotes        |                             |          |                              |          |                               |          |
|                                     | Heterozygotes      | 11.9                        | 11       | 36.4                         | 28       | 37.5                          | 49       |
|                                     | Rare               | 0.6                         | 1        | 12.8                         | 17       | 18.8                          | 13       |
|                                     | Homozygotes        |                             |          |                              |          |                               |          |
|                                     | $\chi^2$ , p-value | $\chi^2 = 0.41$ ; p = 0.230 |          | $\chi^2 = 3.97$ ; p = 0.046* |          | $\chi^2 = 7.05$ ; p = 0.008*  |          |
| COVID-19 patients                   | Common             | 53.2                        | 53       | 18.7                         | 22       | 12.6                          | 6        |
|                                     | Homozygotes        |                             |          |                              |          |                               |          |
|                                     | Heterozygotes      | 6.6                         | 7        | 29.6                         | 23       | 29.8                          | 43       |
|                                     | Rare               | 0.2                         | 0        | 11.7                         | 15       | 17.6                          | 11       |
|                                     | Homozygotes        |                             |          |                              |          |                               |          |
|                                     | $\chi^2$ , p-value | $\chi^2 = 0.63$ ; p = 0.230 |          | $\chi^2 = 2.98$ ; p = 0.084  |          | $\chi^2 = 11.79$ ; p < 0.001* |          |
| Control group (noninfected persons) | Common             | 9.6                         | 10       | 7.4                          | 8        | 6.7                           | 7        |
|                                     | Homozygotes        |                             |          |                              |          |                               |          |
|                                     | Heterozygotes      | 4.8                         | 4        | 6.3                          | 5        | 6.7                           | 6        |
|                                     | Rare               | 0.6                         | 1        | 1.4                          | 2        | 1.7                           | 2        |
|                                     | Homozygotes        |                             |          |                              |          |                               |          |
|                                     | $\chi^2$ , p-value | $\chi^2 = 0.42$ ; p = 0.519 |          | $\chi^2 = 0.64$ ; p = 0.424  |          | $\chi^2 = 0.15$ ; p = 0.699   |          |

Abbreviations:  $\chi^2$ – chi-squared test, p-value – level of its significance.

\* – statistically significant result.
